1 **Cyclic stretch regulates epithelial cell migration in a frequency**  
2 **dependent manner via vinculin recruitment to cell-cell contacts**

3 Authors: Liam P. Dow<sup>1,2\*</sup>, Stacey Surace<sup>2\*</sup>, Katrene Morozov<sup>3</sup>, Reagan Kennedy<sup>4</sup>, Beth L. Pruitt<sup>1,2,5</sup>

4 <sup>1</sup> Biomolecular Science and Engineering, University of California Santa Barbara, 93106, USA

5 <sup>2</sup> Mechanical Engineering, University of California Santa Barbara, 93106, USA

6 <sup>3</sup> Department of Physics, University of California Santa Barbara, 93106, USA

7 <sup>4</sup> Department of Biochemistry and Molecular Biology, University of California Santa Barbara,  
8 93106, USA

9 <sup>5</sup> Department of Bioengineering, University of California Santa Barbara, 93106, USA

10

11 \*These authors contributed equally to this work

12 **Corresponding author:** Beth Pruitt, email: [blp@ucsb.edu](mailto:blp@ucsb.edu)

## 13 **Abstract**

14 Epithelial cell migration is critical in regulating wound healing and tissue development. The  
15 epithelial microenvironment is incredibly dynamic, subjected to mechanical cues including cyclic  
16 stretch. While cyclic cell stretching platforms have revealed responses of the epithelium such as  
17 cell reorientation and gap formation, few studies have investigated the long-term effects of  
18 cyclic stretch on cell migration. We measured the migratory response of the epithelium to a  
19 range of physiologically relevant frequencies and stretch. We integrated our experimental  
20 approach with high-throughput cell segmentation to discover a relationship between changes in  
21 cell morphology and migration as a function of cyclic stretch. Our results indicate that lower  
22 stretch frequencies (i.e., 0.1 Hz) arrest epithelial migration, accompanied by cell reorientation  
23 and high cell shape solidity. We found that this response is also accompanied by increased  
24 recruitment of vinculin to cell-cell contacts, and this recruitment is necessary to arrest cell  
25 movements. This work demonstrates a critical role for frequency dependence in epithelial  
26 response to mechanical stretch. These results confirm the mechanosensitive nature of vinculin  
27 within the adherens junction, but independently reveal a novel mechanism of low frequency  
28 stress response in supporting epithelial integrity by arresting cell migration.

## 29 **Introduction**

30 Organ function and tissue development rely on interconnected sheets of epithelial cells. In adult  
31 tissue, these cells regulate nutrient absorption, filtration, and act as a mechanical barrier against  
32 trauma or pathogenic invasion. During tissue development, they fold and constrict, shaping new  
33 tissues. Unlike passive cellular materials such as foams, cork, honeycombs, etc., the epithelium  
34 consumes and exerts energy as independent units. This property allows epithelial cells to  
35 migrate, rearrange, and alter their cellular shape <sup>1-4</sup>, facilitating their specific functions in  
36 dynamic microenvironments <sup>5</sup>.

37 Epithelial microenvironments exhibit high dynamism, particularly in terms of mechanical stretch  
38 and deformation. For example, lung alveolar epithelial cells experience cyclic stretching due to  
39 respiratory rhythms <sup>6</sup>, while peristaltic contractions of smooth muscle cyclically stretch regions  
40 of the intestinal epithelium <sup>7</sup>. In developing tissues, pulsatile stretches help orchestrate events  
41 such as gastrulation and dorsal closure in *Drosophila* <sup>8,9</sup>. These cyclic mechanical stretches occur  
42 across various epithelial microenvironments but differ significantly in frequency and magnitude.  
43 Many diseases also disrupt the natural mechanics of epithelia by altering stretch magnitudes  
44 and rates, as seen in irritable bowel syndrome <sup>7</sup>, asthma <sup>6,10</sup>, and colorectal cancer <sup>11</sup>.

45 Several studies have employed *in vitro* mechanical stretching experiments to elucidate the  
46 effects of cyclic stretch on epithelial behavior. At higher cyclic stretch amplitudes and  
47 frequencies (>20%, >1 Hz), researchers have observed gap formation in epithelia of parental  
48 Madin-Darby canine kidney (NBL-2) cells <sup>12</sup> and a decrease in wound healing time compared to  
49 an unstretched epithelium <sup>13</sup>. There is also evidence that cyclic stretch mediated wound healing  
50 is ECM dependent <sup>14</sup>. Researchers have also observed epithelial cell shape reorientation in  
51 response to uniaxial cyclic stretch <sup>15-18</sup> which is believed to influence morphogenesis and wound  
52 healing <sup>19,20</sup>. Studies of isolated NRK (normal rat kidney) epithelial cells (stretched from 5-20% at

53 0.5Hz) found stretch-induced reorientation depended on microtubule remodeling<sup>15</sup>, while  
54 studies of isolated A549 alveolar epithelial cells (stretched from 5-15% at 0.3 Hz) found this  
55 reorientation also required stress fiber remodeling (i.e., F-actin)<sup>17</sup>. Stretch frequencies have  
56 ranged broadly from study to study (0.1 Hz – 2.15 Hz)<sup>12,14-18</sup>, which may contribute to different  
57 findings. Moreover, comparison across these studies is complicated by the use of different  
58 strains of epithelial cells which can have different adhesion and proliferation characteristics<sup>21</sup>. In  
59 related experimental studies<sup>22,23</sup> and single cell theoretical models<sup>24</sup>, direct comparisons of the  
60 effects of stretch frequency on endothelial or fibroblast stress fiber reorientation do suggest a  
61 frequency dependent relationship. However, the role of cyclic stretch frequency in regulating  
62 collective epithelial behavior is less clear and we sought to address this gap.

63 Under in-plane mechanical load, epithelial cells exert forces on each other at their cell-cell  
64 contacts. These contacts encompass several junctions, including tight junctions, desmosomes,  
65 gap junctions, and adherens junctions<sup>25-27</sup>. Among these, the adherens junction plays a  
66 mechanosensitive role in guiding cell migration<sup>28</sup> and regulating cell proliferation<sup>29,30</sup>, even  
67 responding to static stretches<sup>31-33</sup>. Yet, the role of the adherens junction in regulating responses  
68 to cyclic stretch is unknown.

69 The transmembrane protein E-cadherin serves as the intercellular mechanical linkage in the  
70 adherens junction. E-cadherin forms a trimeric complex with cytosolic  $\beta$ -catenin and  $\alpha$ -catenin,  
71 which binds to F-actin<sup>25</sup>. Various adapter proteins stabilize the binding of this complex to F-actin  
72 under mechanical load. For example, p120-catenin localizes to E-cadherin to block clathrin-  
73 mediated endocytosis of E-cadherin and maintain stability of the complex<sup>34</sup>. Another protein,  
74 vinculin, reinforces the  $\alpha$ -catenin/F-actin interaction under mechanical load<sup>35-37</sup> to fortify the  
75 adherens junction<sup>38</sup>. Despite the known mechanosensitive recruitment of vinculin to the  
76 adherens junction, it is unclear how it is recruited with cyclic stretch and how that recruitment  
77 affects epithelial shape change and migration.

78 We sought to learn how different frequencies of uniaxial cyclic stretch impacted epithelial  
79 behavior and the potential role of vinculin in mediating this behavior. We subjected high  
80 density, confluent Madin-Darby canine kidney (MDCK type II) epithelial monolayers to a range of  
81 physiological cyclic stretch frequencies (0.1 Hz, 0.5 Hz, and 1 Hz) at a physiological stretch  
82 magnitude of ~10%<sup>39,40</sup>. Observing the effect of cyclic stretch on the epithelium over time is  
83 challenging because stretch devices must be amenable to long-term live cell imaging; to  
84 overcome this challenge, we integrated a programmable pneumatic cell stretching device<sup>41</sup> with  
85 a microfluidic perfusion system to observe cell migration after cyclic stretch.

## 86 **Results**

### 87 *Cells adjust morphology in response to cyclic stretch*

88 To investigate the long-term dynamic response of the epithelium to cyclic stretch, we utilized a  
89 pneumatic cell stretcher device previously detailed<sup>41</sup> (**Fig. 1a**). First, we created a  
90 polydimethylsiloxane (PDMS) device from a 3-D printed mold and adhered a thin PDMS bottom  
91 membrane, forming 2 main channels. The center channel, flanked by inlet and outlet ports,

92 functioned as the substrate for the epithelium. The outer air-filled channel, encircling the center  
93 channel, contracted when vacuum was applied. This contraction of the outer channel led to the  
94 uniaxial stretching of the membrane of the central channel and the adherent epithelium. By  
95 applying a programmable input pressure of 60 kPa, cells were uniaxially stretched<sup>29,41</sup>, resulting  
96 in  $\epsilon_{yy} = 10\% \pm 2\%$  as measured by cell membrane elongation (**Supplementary Fig. 1a**). Since this  
97 small level of stretch is difficult to observe, stretched cells were labeled with Hoechst to  
98 visualize nuclei displacement (**Fig. 1b**). To examine the impact of 10% stretch on cell  
99 morphology, we performed a high-throughput automated segmentation of the epithelium  
100 before and after stretch (**Supplementary Fig. 1b-d**). This method enabled the analysis of  
101 numerous cells, offering robust statistical power to identify variations in cell morphology such as  
102 average cell area and perimeter.

103 After validating that a 10% static stretch changed cell morphology, we subjected the epithelium  
104 to 1 Hz, 0.5 Hz, or 0.1 Hz cyclic stretch of 10% for 30 minutes (**Fig. 1c**). We imaged the  
105 epithelium before and after cyclic stretch, with the membrane fully relaxed (time = -0.5 hours  
106 and 0 hours, respectively). We then performed a large-scale segmentation of all images, which  
107 was made possible by a stably transfected cell line with a GFP E-cadherin fluorophore<sup>42</sup>. We  
108 extracted several shape descriptors from these segmented images, including cell solidity.

109 Solidity is defined as  $\frac{A_{cell}}{A_{convex}}$ , where  $A_{cell}$  is the cell area and  $A_{convex}$  is the convex area. Higher  
110 solidity indicates rounder cells, while lower solidity implies more protrusions<sup>43</sup>. This metric has  
111 been used to assess cell deformability and is associated with age-related macular degeneration  
112 of retinal pigment epithelial cells<sup>44,45</sup>. Interestingly, we found that solidity was highly frequency  
113 dependent (**Fig. 1d**). Higher frequency (1 Hz) stretch or no-stretch led to decreased average cell  
114 solidity. In contrast, lower frequencies (0.5 Hz and 0.1 Hz) did not elicit changes in average cell  
115 solidity, with a subtle increase (though not statistically significant). Cell morphological  
116 parameters including circularity and shape index ( $Perimeter/\sqrt{Area}$ ) were also disrupted  
117 under higher frequency 1 Hz cyclic stretch, but not 0.1 Hz (**Supplementary Fig. S2**).

118 At the lower frequency of 0.1 Hz, we also observed a reorientation of epithelial cells (**Fig. 1e-g**).  
119 Cells reduced their length in the direction of uniaxial stretch (y) and extended their length  
120 perpendicular to stretch (x). This shape change corroborates previous studies of how cyclic  
121 stretch modulates cell shape<sup>15,18,46</sup>. Furthermore, we did not observe cell reorientation at 0.5 Hz  
122 or 1.0 Hz. These investigations extended the analysis of morphological shifts by linking  
123 reorientation to the stabilization of cell solidity. These morphological alterations suggested a  
124 role for intercellular signaling at cell-cell contacts.

#### 125 *Low frequency stretch arrests epithelial migration*

126 After cyclic stretching the epithelium for 30 minutes (time = 0 hours), we observed how the  
127 epithelium changed its collective migration over the next 6 hours (**Fig. 2a**). Comprehensive  
128 studies of how cyclic stretch governs the collective epithelium are limited, partly due to the  
129 challenges inherent in such investigations. Conducting live cell imaging for prolonged periods on  
130 a cell stretcher platform is demanding. The bottom membrane must be both transparent and  
131 thin enough for imaging, and many cell stretcher setups are not fully enclosed. Open systems

132 are susceptible to media evaporation within hours and cannot be continuously imaged on a  
133 microscope. To counteract this challenge, we integrated a microfluidic based perfusion system  
134 within our device to prevent evaporation (**Fig. 2b**). A syringe pump sustained a slow media flow  
135 rate of 300  $\mu\text{L/hr}$ , resulting in minimal shear stress of approximately  $1 \times 10^{-6}$  dyne/cm<sup>2</sup> on the  
136 apical epithelium (**Fig. S3**). Furthermore, we eliminated out of plane drift during imaging by  
137 adhering the device to a thin glass coverslip.

138 We utilized particle image velocimetry (PIV) to track displacement of cells during this 6-hour  
139 period. This method facilitated the calculation of migration parameters including average speed,  
140 total distance traveled, and specific x and y movements.

141 Average speeds for the no-stretch control, 1 Hz, and 0.5 Hz conditions were approximately 5-6  
142  $\mu\text{m/hr}$ . Notably, the slowest frequency condition (0.1 Hz) displayed a significant reduction in  
143 average speed to around 3.8  $\mu\text{m/hr}$  (**Fig. 2c**). The total distance traveled aligned closely with the  
144 average speed results, with 0.1-Hz stretched cells covering nearly half the distance of cells in the  
145 other conditions (**Fig. 2d**).

146 To discern whether the migratory responses occurred over different timeframes, potentially  
147 masking variations in speed averages, we plotted migration speed against time (**Fig. 2e**).  
148 Notably, the speed was most significantly disrupted immediately following a 0.1 Hz cyclic  
149 stretch. After 6 hours the speed equalized across all frequencies, resembling the no-stretch  
150 control. Surprisingly, the migratory response of cells in the 0.5 Hz and 1 Hz conditions closely  
151 matched the migration timescales of the control condition. In all cases, we observed a sigmoidal  
152 response in speed fluctuation over time, with initial deceleration, brief acceleration, and  
153 subsequent deceleration towards the end of the observation period.

154 Given the uniaxial nature of the applied stretch ( $\epsilon_{yy}$ ), we also explored the possibility of  
155 direction-specific migration dysregulation. However, migration was slowed *both* the direction of  
156 stretch (y) and perpendicular to stretch (x) (**Fig. 2 f-i**).

#### 157 *Adherens junction regulates arrest of cell movements*

158 After establishing that slow frequencies disrupted collective epithelial migration speed, we  
159 investigated the role of an intact adherens junction in regulating this migration reduction.  
160 Therefore, we utilized MDCK cells expressing a mutant E-cadherin protein (T151 cells, made in  
161 an MDCK GII background), lacking the extracellular domain of E-cadherin, thus inhibiting  
162 adherens junction interaction<sup>47</sup>. The T151 MDCK cells have a doxycycline (DOX) repressible  
163 promoter<sup>47</sup>; they maintain a wild-type (WT) E-cadherin ectodomain when cultured with DOX.  
164 Removal of DOX from the media causes the E-cadherin to mutate, leading to the absence of the  
165 outer ectodomain<sup>47</sup>. The presence of the mutated E-cadherin inhibits mechanical linkages at the  
166 adherens junction (**Fig. 3a**), though cells are still able to attach via desmosomes and tight  
167 junctions.

168 We noted distinctive characteristics of the T151 epithelium compared to WT MDCK epithelium.  
169 First, in our hands the epithelium did not grow as dense. Second, small holes can form in the  
170 epithelium over time, a phenomenon which has been previously reported<sup>47</sup>.

171 Overall, we found that T151 cells were more migratory and maintained a faster average  
172 migration speed of approximately 25  $\mu\text{m/hr}$ . Despite the increase in migration speed compared  
173 to the wild-type MDCK cells, we observed no differences in migration between T151 cells  
174 subjected to 0.1 Hz cyclic stretch and those without cyclic stretch (**Fig. 3b, c**). Furthermore,  
175 migration alterations over time were not significant (**Fig. 3d-f**). Immunohistochemistry (IHC)  
176 staining of the devices confirmed the lack of an adherens junction complex, as evidenced by  
177 minimal p120-catenin expression at cell-cell contacts (**Fig. S4**). Together, these results indicate  
178 that an intact adherens junction is necessary for reduced migration following 0.1 Hz cyclic  
179 stretch.

#### 180 *Cell-cell contacts recruit vinculin in response to low frequency stretch*

181 After establishing the stretch dependent migratory response of the adherens junction, we  
182 looked at the role of vinculin further downstream within the complex. Vinculin is known to  
183 support the adherens junctions by stabilizing the  $\alpha$ -catenin and F-actin interaction in a force  
184 sensitive manner<sup>48</sup>. While vinculin's mechanosensitive role within the adherens junction is  
185 acknowledged<sup>35,36</sup>, its involvement in supporting cell-cell contacts under cyclic stretch, as well  
186 as its duration of action in reinforcing the adherens junction, remain less clear.

187 We conducted a new set of experiments to test the effect of 0.1 Hz cyclic stretch on localization  
188 of vinculin. These experiments were conducted under two different time conditions: cells were  
189 fixed immediately after 0.1 Hz cyclic stretch (0 hr) or allowed to relax for 30 minutes before  
190 fixing and staining (0.5 hr) (**Fig. 4a**). No-stretch control devices were fixed and stained following  
191 the same time intervals.

192 We found that while vinculin was predominantly cytoplasmic in the control condition, its  
193 localization increased at cell-cell contacts immediately after 0.1 Hz cyclic stretch. Interestingly,  
194 this intercellular vinculin recruitment was short-lived, with significant vinculin loss from cell-cell  
195 contacts after just 30 minutes. However, these levels remained higher than control levels.

#### 196 *High-throughput quantification of vinculin localization*

197 We quantified vinculin recruitment to cell-cell contacts using a cell segmentation approach.  
198 Traditional fluorescence intensity measurements for quantifying protein recruitment at cell-cell  
199 contacts are often low-throughput and subject to user bias. In contrast, cell segmentation offers  
200 increased throughput, enhanced statistical power, and reduces user bias (**Fig. 4b**). E-cadherin  
201 GFP labeled MDCK cells were segmented, and their shape outlines were then overlaid onto the  
202 corresponding vinculin-stained images of the same cells. The outlines were eroded either 0 or 3  
203 pixels to encompass the entire cell or isolate the cytoplasmic region, respectively (**Fig. 4c**). By  
204 measuring the mean fluorescence intensity of both the entire cell and the cytoplasmic region  
205 ( $I_{\text{total}}$  and  $I_{\text{cyto}}$ , respectively), then calculating the area fraction of the eroded region (**Fig. S5**), we  
206 calculated the mean fluorescence intensity of vinculin at the cell-cell contact ( $I_{\text{AJ}}$ ) for nearly  
207 every cell across all images.

208 Our results indicate that in a homeostatic state without applied mechanical stretch, a slightly  
209 higher  $I_{\text{AJ}}/I_{\text{cyto}}$  ratio exists ( $\sim 1.08$ , **Fig. 4d**). Following 0.1 Hz cyclic stretch, this ratio increased to

210 ~1.13, signifying a robust recruitment of vinculin to cell-cell contacts (**Fig. 4d**). Notably, vinculin  
211 recruitment was transient, with a significant reduction in  $I_{AJ}/I_{cyto}$  (~1.09) after just 30 minutes of  
212 cell relaxation. However,  $I_{AJ}/I_{cyto}$  vinculin levels remained statistically higher than in the control  
213 condition.

214 *Vinculin is necessary to suppress migration in response to cyclic stretch*

215 With evidence of vinculin recruitment to cell-cell contacts under 0.1 Hz cyclic stretch, we tested  
216 whether vinculin was necessary for this mechanically regulated migration change. We repeated  
217 migration studies using a vinculin knock-out (KO) cell line, made in the MDCK GII background<sup>49</sup>.  
218 Vinculin KO cells were observed after 30 minutes of 0.1 Hz cyclic stretch, as well as in a no-  
219 stretch control. We noted that the no-stretch control Vinculin KO cells moved slightly quicker  
220 (18-20  $\mu\text{m}/\text{hr}$ ) than the WT MDCK cells, consistent with other studies<sup>50,51</sup>. However, Vinculin KO  
221 cells observed after 0.1 Hz uniaxial mechanical stretch slightly increased in movement, though  
222 not statistically significantly (**Fig. 5b and 5c**). This trend contrasted with the migration reduction  
223 in the MDCK WT cells after cyclic stretch. Across all timepoints, there was a tight migration band  
224 with a sigmoidal shape, indicating little variation in the speed of the cells whether subjected to  
225 mechanical force or not (**Fig. 5d-f**). These migration trends were independent of direction (**Fig.**  
226 **5e, f**).

227 IHC staining of devices after the 6-hour observation period also indicated a shift towards more  
228 cytoplasmic p120-catenin (**Fig. S6**). These results suggest that vinculin regulates recruitment or  
229 stabilization of other adapter proteins at the adherens junction.

230 We also labeled plasma membranes prior to cyclic stretch to observe changes in cell  
231 morphology (**Fig. 5g—i**). Strikingly, the Vinculin KO cells retained their solidity similarly to WT  
232 MDCK cells in response to 0.1 Hz cyclic stretch (**Fig. 5g**). The Vinculin KO cells also shortened  
233 their average length in *both* the (x) and (y) directions (**Fig. 5i**).

234 In conclusion, these findings support vinculin's role in regulating epithelial migration and cell  
235 length changes in response to low frequency cyclic stretch, while its role in regulating solidity was  
236 not significant.

237

## 238 **Discussion**

239 After discovering that slower frequencies (0.1 Hz) regulated cell shape and migration, we  
240 investigated the adherens junction as a mechanosignaling center. Using E-cadherin T151  
241 mutants, Vinculin KO lines, and immunohistochemistry, we confirm 3 unique findings: i) vinculin  
242 is recruited to cell-cell contacts under 0.1 Hz cyclic stretch, ii) this vinculin recruitment is  
243 transient and reduces quickly, iii) and the migratory response of the epithelium at 0.1 Hz  
244 depends on vinculin.

245 Our work extends prior studies on cyclic cell stretching by focusing on how different frequencies  
246 impact epithelial cell morphology and migration. While higher frequencies (1 Hz and 0.5 Hz) did  
247 not significantly alter epithelial cell migration speeds, subjecting cells to 0.1 Hz cyclic stretch for  
248 30 minutes significantly decelerated epithelial movements over a 6-hour observation period.

249 By quantifying changes in cell morphology and migration, we obtained new information about  
250 collective epithelial behavior during cyclic stretch. Previous studies reported that epithelial cells  
251 reorient their shapes in response to cyclic stretch, even among different conditions<sup>15,17</sup>. Our  
252 results corroborate this effect, but also demonstrate a frequency dependence.

253 We also found that cells retained their cell solidity at 0.1 Hz, while cell solidity decreased in the  
254 no-stretch control and higher frequency stretch conditions. Increased cell solidity is generally  
255 associated with more solid-like epithelia<sup>52</sup>, making the reduced epithelial movements following  
256 0.1 Hz stretch consistent with the retention of high cell solidity. Furthermore, we conclude that  
257 vinculin does not regulate the change in solidity. We noted that cells also experienced unique  
258 shape changes at 1 Hz that did not occur in other frequencies (**Fig. S2**). These changes included  
259 increased cell circularity and increased cell shape index, suggesting increased cell fluidity.

260 By conducting experiments with cells expressing a mutant E-cadherin protein (T151 cells), we  
261 demonstrated that cell migration arrest following 0.1 Hz depends on intact E-cadherin  
262 interactions at the adherens junction. Previous studies have shown that E-cadherin regulates  
263 force transfer between cells to regulate directed migration<sup>31,53</sup>. We build on these studies by  
264 extending its necessity for a response to cyclic stretch via reducing cell migration.

265 To understand this finding, we characterized the role of vinculin in response to cyclic stretching.  
266 While vinculin plays a role in stabilizing the adherens junction, it also helps stabilize the focal  
267 adhesions of cell-ECM contacts<sup>54</sup>. Recently, vinculin has been found to have an antagonistic  
268 relationship between the two regions of the cell<sup>35</sup>, i.e., by perturbing vinculin expression at cell-  
269 cell contacts, vinculin at cell-ECM contacts can be disrupted. Therefore, vinculin recruitment to  
270 cell-cell contacts observed after 0.1 Hz cyclic stretch may dysregulate vinculin at cell-ECM  
271 contacts and helps arrest cell movements. This connection between protein regulation at cell-  
272 cell junctions and cell-ECM junctions is worth exploring in future studies.

273 An important tool we leveraged for this study was high-throughput cell segmentation. Not only  
274 did this approach significantly boost our statistical power in morphology measurements, but  
275 offered a robust method to quantify vinculin expression at cell-cell contacts with minimal user  
276 bias. For future studies (by us or others), we recommend a similar approach for quantifying  
277 expression of proteins at cell-cell contacts. The user only needs a membrane label for cell  
278 segmentation. Several computational and analytical tools (e.g., Cellpose, ImageJ, etc.) are open  
279 source.

280 We present here a study that i) confirms a role for different mechanical stretch frequencies in  
281 regulating collective epithelial behavior and ii) presents a novel role for vinculin in reinforcing  
282 cell-cell contacts under cyclic stretch. These results help elucidate differences observed across  
283 other cyclic stretch studies while helping understand the role of mechanical cues in regulating  
284 epithelial function.

285

## 286 **Materials and Methods**

287 *Cell Culture and Cell Seeding*



288 We used MDCK GII cells, Vinculin KO, and T151 mutant cells lacking the extracellular domain of  
289 E-cadherin both in the same MDCK GII background, as reported previously<sup>42,47,49</sup>. GFP E-  
290 cadherin MDCK and Vinculin KO cells were cultured in low glucose DMEM (*ThermoFisher*,  
291 *11885084*) supplemented with 10% fetal bovine serum and 1% penicillin-streptomycin at 37° C  
292 with 5% CO<sub>2</sub>. Approximately 400,000 cells in 400 µL of cell culture media were seeded in the  
293 device 36-48 h prior to experiments to create densely packed confluent monolayers.  
294 Approximately 15 hours prior to experiments, culture media was replaced with phenol-red-free  
295 homemade basal medium (see full reagent list in SI) supplemented with 10% fetal bovine serum,  
296 1% penicillin-streptomycin, and 50 mM HEPES to buffer the cell culture media during long-term  
297 microscopy.

298

299 T151 MDCK E-cadherin mutant cells were cultured under the same conditions, except for the  
300 addition of 20 ng/mL of doxycycline to the culture media. Addition of doxycycline represses the  
301 genetically modified promoter region of the mutant gene to maintain a wild-type phenotype in  
302 culture conditions<sup>47</sup>. For experiments, doxycycline was removed from the media during device  
303 seeding, approximately 36 hours before the experiment.

304

#### 305 *Cyclic stretching experiments*

306 The MDCK epithelium was imaged and cyclically stretched in a temperature-controlled chamber  
307 (37°C) of a Zeiss AxioObserver 7 inverted microscope. To cyclically stretch the epithelium, a  
308 vacuum tube connected to an electronic pressure controller (from *Red Dog Research*) was  
309 inserted into the hole in the vacuum chamber of the device. The controller is programmed to  
310 apply 0 to 60 kPa of pressure in a sinusoidal wave at variable frequencies (0.1 Hz, 0.5 Hz, or 1 Hz  
311 depending on the experiment). Immediately after cyclic stretch, the device was briefly imaged  
312 and integrated with a perfusion system for a 6-hour imaging period (see SI for details).

#### 313 *High-throughput cell segmentation and ROI filtration*

314 All images used for cell segmentation were taken using a 20x air objective (NA=0.8) and were  
315 labeled with a fluorescently tagged for E-cadherin to denote the cell-cell boundary. We utilized  
316 the CellPose “cyto” model<sup>55</sup> with a calibration of 50 pixels per image while excluding cells on  
317 edges. ImageJ’s LabelsToROIs plugin was used for shape analysis. See SI for additional post-  
318 processing details.

#### 319 *Statistics*

320 Statistics were generated from a two-tailed student t-test assuming equal variance. For PIV  
321 migration data that exhibited a non-normal distribution as determined by the Shapiro-Wilk test,  
322 we used a Mann-Whitney U test (*OriginPro 2022b*, *OriginLab*). P values are denoted as \* $p < .05$ ;  
323 \*\* $p < .005$ ; \*\*\*  $p < .0005$ . Dotted lines in all violin plots represent the 25<sup>th</sup>/75<sup>th</sup> percentiles of  
324 data distribution, while the solid lines represent the mean. Shaded regions in all 6-hour  
325 migration observation plots represent the 95% CI. I-bars in all scatter plots represent the mean  $\pm$   
326 SD. For each independent experiment, we imaged 2-4 different regions across the epithelium

327 when observing migration. For segmentation analysis, approximately 8 different regions of the  
328 epithelium were imaged.

### 329 *Antibodies*

330 The following primary antibodies were used as previously demonstrated in MDCK cells: purified  
331 mouse anti-p120 catenin<sup>56</sup> (*BD Biosciences*, 610133) at a dilution of 1:200 and recombinant  
332 rabbit monoclonal anti-vinculin<sup>35</sup> (*abcam*, ab129002) at a dilution of 1:100. The following  
333 secondary antibodies were used, both at a 1:500 dilution: Goat anti-Mouse IgG Alexa Fluor 647  
334 (*Invitrogen*, A32728) and Goat anti-Rabbit IgG Alexa Fluor 405 (*Invitrogen*, A-31556). Antibodies  
335 were diluted in PBS + 0.1% Tween20 (1X) + 1% BSA.

336

### 337 **Acknowledgments**

338 The authors acknowledge funding from the NSF (1834760) and the cooperative agreement  
339 W911NF-19-2-0026 from the U.S. Army Research Office for the Institute for Collaborative  
340 Biotechnologies. LPD acknowledges the BioPACIFIC Materials Innovation Platform of the  
341 National Science Foundation (Award No. DMR-1933487) as well as useful discussions with Pruitt  
342 Lab members and M. Cristina Marchetti. The authors are also thankful to So Yomada and  
343 Sanjeevi Sivasankar (UC Davis) who gifted the Vinculin KO cells, as well as W. James Nelson who  
344 gifted the T151 and E-cadherin GFP MDCK cells. The authors acknowledge the use of the  
345 Microfluidics Lab within the California NanoSystems Institute, supported by the University of  
346 California, Santa Barbara and the University of California, Office of the President.

347 **Author Contributions:** LPD and BLP conceived of study. LPD and BLP designed experiments.  
348 LPD and SS performed experiments and analyzed data. KM and RK contributed analytical tools  
349 for cell segmentation and PIV, respectively. LPD and SS wrote the original manuscript draft,  
350 which was reviewed and edited by LPD, SS, and BLP. BLP provided project funding and  
351 supervision.

352 **Competing Interest Statement:** The authors have no competing interests to disclose

353

### 354 **References**

355

- 356 1. Marchetti, M. C. *et al.* Hydrodynamics of soft active matter. *Rev. Mod. Phys.* **85**, 1143–  
357 1189 (2013).
- 358 2. Bernheim-Groswasser, A. *et al.* Living Matter: Mesoscopic Active Materials. *Adv. Mater.*  
359 **30**, 1707028 (2018).
- 360 3. Atia, L. *et al.* Geometric constraints during epithelial jamming. *Nat. Phys.* **14**, (2018).
- 361 4. Nelson, C. M., Khauv, D., Bissell, M. J. & Radisky, D. C. Change in cell shape is required  
362 for matrix metalloproteinase-induced epithelial-mesenchymal transition of mammary  
363 epithelial cells. *J. Cell. Biochem.* **105**, 25–33 (2008).
- 364 5. Armon, S., Bull, M. S., Moriel, A., Aharoni, H. & Prakash, M. Modeling epithelial tissues as  
365 active-elastic sheets reproduce contraction pulses and predict rip resistance. *Commun.*

- 366            *Phys. 2021 41 4*, 1–9 (2021).
- 367    6.        Savla, U., Sporn, P. H. S. & Waters, C. M. Cyclic stretch of airway epithelium inhibits  
368            prostanoid synthesis. *Am. J. Physiol. - Lung Cell. Mol. Physiol.* **273**, (1997).
- 369    7.        Gayer, C. P. & Basson, M. D. *The effects of mechanical forces on intestinal physiology*  
370            *and pathology. Cellular Signalling* vol. 21 1237–1244 (Pergamon, 2009).
- 371    8.        Miao, H. & Blankenship, J. T. The pulse of morphogenesis: Actomyosin dynamics and  
372            regulation in epithelia. *Dev.* **147**, (2020).
- 373    9.        Kim, H. Y. & Davidson, L. A. Punctuated actin contractions during convergent extension  
374            and their permissive regulation by the non-canonical Wnt-signaling pathway. *J. Cell Sci.*  
375            **124**, 635–646 (2011).
- 376    10.       Park, J.-A. A. *et al.* Unjamming and cell shape in the asthmatic airway epithelium. *Nat.*  
377            *Mater.* **14**, 1040–1048 (2015).
- 378    11.       Ciasca, G., Papi, M., Minelli, E., Palmieri, V. & De Spirito, M. Changes in cellular  
379            mechanical properties during onset or progression of colorectal cancer. *World J.*  
380            *Gastroenterol.* **22**, 7203 (2016).
- 381    12.       Xu, J. *et al.* Cellular mechanics of wound formation in single cell layer under cyclic  
382            stretching. *Biophys. J.* **121**, 288–299 (2022).
- 383    13.       Xu, J., Wang, Q., Li, X., Zheng, Y. & Ji, B. Cellular mechanisms of wound closure under  
384            cyclic stretching. *Biophysj* **122**, 2404–2420 (2023).
- 385    14.       Zhang, J., Owen, C. R., Sanders, M. A., Turner, J. R. & Basson, M. D. The Motogenic  
386            Effects of Cyclic Mechanical Strain on Intestinal Epithelial Monolayer Wound Closure Are  
387            Matrix Dependent. *Gastroenterology* **131**, 1179–1189 (2006).
- 388    15.       Lien, J. C. & Wang, Y. li. Cyclic stretching-induced epithelial cell reorientation is driven by  
389            microtubule-modulated transverse extension during the relaxation phase. *Sci. Reports*  
390            *2021 111 11*, 1–12 (2021).
- 391    16.       Lien, J.-C. & Wang, Y. Cyclic Stretching Combined with Cell-Cell Adhesion Is Sufficient for  
392            Inducing Cell Intercalation. *Biophys. J. Lien J* (2023) doi:10.1016/j.bpj.2023.06.019.
- 393    17.       Roshanzadeh, A. *et al.* Mechanoadaptive organization of stress fiber subtypes in epithelial  
394            cells under cyclic stretches and stretch release. *Sci. Reports 2020 101 10*, 1–14 (2020).
- 395    18.       G er emie, L. *et al.* Evolution of a confluent gut epithelium under on-chip cyclic stretching.  
396            *Phys. Rev. Res.* **4**, 023032 (2022).
- 397    19.       Matsumoto, T. *et al.* Mechanical Strain Regulates Endothelial Cell Patterning In Vitro.  
398            <https://home.liebertpub.com/ten> **13**, 207–217 (2007).
- 399    20.       Lee, E. *et al.* Transplantation of cyclic stretched fibroblasts accelerates the wound-healing  
400            process in streptozotocin-induced diabetic mice. *Cell Transplant.* **23**, 285–301 (2014).
- 401    21.       Dukes, J. D., Whitley, P. & Chalmers, A. D. The MDCK variety pack: Choosing the right  
402            strain. *BMC Cell Biol.* **12**, 1–4 (2011).

- 403 22. Hsu, H. J., Lee, C. F., Locke, A., Vanderzyl, S. Q. & Kaunas, R. Stretch-Induced Stress  
404 Fiber Remodeling and the Activations of JNK and ERK Depend on Mechanical Strain  
405 Rate, but Not FAK. *PLoS One* **5**, e12470 (2010).
- 406 23. Lee, C. F., Haase, C., Deguchi, S. & Kaunas, R. Cyclic stretch-induced stress fiber  
407 dynamics – Dependence on strain rate, Rho-kinase and MLCK. *Biochem. Biophys. Res.*  
408 *Commun.* **401**, 344–349 (2010).
- 409 24. De, R., Zemel, A. & Safran, S. A. Dynamics of cell orientation. *Nat. Phys.* 2007 **39** **3**, 655–  
410 659 (2007).
- 411 25. Meng, W. & Takeichi, M. *Adherens junction: molecular architecture and regulation*. *Cold*  
412 *Spring Harbor perspectives in biology* vol. 1 a002899 (Cold Spring Harbor Laboratory  
413 Press, 2009).
- 414 26. Niessen, C. M. Tight Junctions/Adherens Junctions: Basic Structure and Function. *J.*  
415 *Invest. Dermatol.* **127**, 2525–2532 (2007).
- 416 27. Runswick, S. K., O'Hare, M. J., Jones, L., Streuli, C. H. & Garrod, D. R. Desmosomal  
417 adhesion regulates epithelial morphogenesis and cell positioning. *Nat. Cell Biol.* 2001 **39**  
418 **3**, 823–830 (2001).
- 419 28. Ariyasinghe, N. R. *et al.* Engineering micromyocardium to delineate cellular and  
420 extracellular regulation of myocardial tissue contractility. *Integr. Biol. (United Kingdom)* **9**,  
421 730–741 (2017).
- 422 29. Hart, K. C. *et al.* E-cadherin and LGN align epithelial cell divisions with tissue tension  
423 independently of cell shape. *Proc. Natl. Acad. Sci. U. S. A.* **114**, E5845–E5853 (2017).
- 424 30. Benham-Pyle, B. W., Pruitt, B. L. & Nelson, W. J. Mechanical strain induces E-cadherin-  
425 dependent Yap1 and  $\beta$ -catenin activation to drive cell cycle entry. *Science (80-. )*. **348**,  
426 1024–1027 (2015).
- 427 31. Sadeghipour, E., Garcia, M. A., Nelson, W. J. & Pruitt, B. L. Shear-induced damped  
428 oscillations in an epithelium depend on actomyosin contraction and E-cadherin cell  
429 adhesion. *Elife* **7**, 1–16 (2018).
- 430 32. Weber, G. F., Bjerke, M. A. & DeSimone, D. W. A Mechanoresponsive Cadherin-Keratin  
431 Complex Directs Polarized Protrusive Behavior and Collective Cell Migration. *Dev. Cell*  
432 **22**, 104–115 (2012).
- 433 33. Vishwakarma, M. *et al.* Mechanical interactions among followers determine the  
434 emergence of leaders in migrating epithelial cell collectives. *Nat. Commun.* 2018 **91** **9**, 1–  
435 12 (2018).
- 436 34. Menke, A. & Giehl, K. *Regulation of adherens junctions by Rho GTPases and p120-*  
437 *catenin*. *Archives of Biochemistry and Biophysics* vol. 524 48–55 (2012).
- 438 35. Bejar-Padilla, V. *et al.*  $\alpha$ -Catenin-dependent vinculin recruitment to adherens junctions is  
439 antagonistic to focal adhesions. *Mol. Biol. Cell* **33**, (2022).
- 440 36. Le Duc, Q. *et al.* Vinculin potentiates E-cadherin mechanosensing and is recruited to  
441 actin-anchored sites within adherens junctions in a myosin II-dependent manner. *J. Cell*

- 442 *Biol.* **189**, 1107–1115 (2010).
- 443 37. LaCroix, A. S., Lynch, A. D., Berginski, M. E. & Hoffman, B. D. Tunable molecular tension  
444 sensors reveal extension-based control of vinculin loading. *Elife* **7**, (2018).
- 445 38. Thomas, W. A. *et al.*  $\alpha$ -Catenin and vinculin cooperate to promote high E-cadherin-based  
446 adhesion strength. *J. Biol. Chem.* **288**, 4957–4969 (2013).
- 447 39. Birukov, K. G. *et al.* Magnitude-dependent regulation of pulmonary endothelial cell barrier  
448 function by cyclic stretch. *Am. J. Physiol. Lung Cell. Mol. Physiol.* **285**, (2003).
- 449 40. Miftakhov, R. N. & Wingate, D. L. Biomechanics of small bowel motility. *Med. Eng. Phys.*  
450 **16**, 406–415 (1994).
- 451 41. Hart, K. C. *et al.* An Easy-to-Fabricate Cell Stretcher Reveals Density-Dependent  
452 Mechanical Regulation of Collective Cell Movements in Epithelia. *Cell. Mol. Bioeng.* **14**,  
453 569–581 (2021).
- 454 42. Yamada, S., Pokutta, S., Drees, F., Weis, W. I. & Nelson, W. J. Deconstructing the  
455 cadherin-catenin-actin complex. *Cell* **123**, 889–901 (2005).
- 456 43. Pasqualato, A. *et al.* Shape in migration. <http://dx.doi.org/10.4161/cam.26765> **7**, 450–459  
457 (2013).
- 458 44. von der Emde, L. *et al.* Histologic Cell Shape Descriptors for the Retinal Pigment  
459 Epithelium in Age-Related Macular Degeneration: A Comparison to Unaffected Eyes.  
460 *Transl. Vis. Sci. Technol.* **11**, 19–19 (2022).
- 461 45. Kim, Y. K. *et al.* Morphometric Analysis of Retinal Pigment Epithelial Cells From C57BL/6J  
462 Mice During Aging. *Invest. Ophthalmol. Vis. Sci.* **62**, 32–32 (2021).
- 463 46. Wang, J. H. C., Goldschmidt-Clermont, P., Wille, J. & Yin, F. C. P. Specificity of  
464 endothelial cell reorientation in response to cyclic mechanical stretching. *J. Biomech.* **34**,  
465 1563–1572 (2001).
- 466 47. Troxell, M. L. *et al.* Inhibiting cadherin function by dominant mutant E-cadherin expression  
467 increases the extent of tight junction assembly. *J. Cell Sci.* **113**, 985–996 (2000).
- 468 48. Seddiki, R. *et al.* Force-dependent binding of vinculin to  $\alpha$ -catenin regulates cell-cell  
469 contact stability and collective cell behavior. *Mol. Biol. Cell* **29**, 380–388 (2018).
- 470 49. Koirala, R. *et al.* Inside-out regulation of E-cadherin conformation and adhesion. *Proc.*  
471 *Natl. Acad. Sci. U. S. A.* **118**, 2021 (2021).
- 472 50. Bazellières, E. *et al.* Control of cell–cell forces and collective cell dynamics by the  
473 intercellular adhesome. *Nat. Cell Biol.* **2014 174 17**, 409–420 (2015).
- 474 51. Shoyer, T. C., Gates, E. M., Cabe, J. I., Conway, D. E. & Hoffman, B. D. Coupling During  
475 Collective Cell Migration is Controlled by a Vinculin Mechanochemical Switch. *bioRxiv*  
476 (2023) doi:10.1101/2023.01.13.523997.
- 477 52. Heydarian, A., Milani, D. & Moein Fatemi, S. M. An investigation of the viscoelastic  
478 behavior of MCF-10A and MCF-7 cells. *Biochem. Biophys. Res. Commun.* **529**, 432–436

- 479 (2020).
- 480 53. Cai, D. *et al.* Mechanical feedback through E-cadherin promotes direction sensing during  
481 collective cell migration. *Cell* **157**, 1146–1159 (2014).
- 482 54. Bays, J. L. & DeMali, K. A. Vinculin in cell–cell and cell–matrix adhesions. *Cell. Mol. Life*  
483 *Sci.* **2017 7416 74**, 2999–3009 (2017).
- 484 55. Stringer, C., Wang, T., Michaelos, M. & Pachitariu, M. Cellpose: a generalist algorithm for  
485 cellular segmentation. *Nat. Methods* **2020 181 18**, 100–106 (2020).
- 486 56. Lang, R. A., Herman, K., Reynolds, A. B., Hildebrand, J. D. & Plageman, T. F. p120-  
487 catenin-dependent junctional recruitment of Shroom3 is required for apical constriction  
488 during lens pit morphogenesis. *Development* **141**, 3177–3187 (2014).

489 **Figures and Tables**  
490

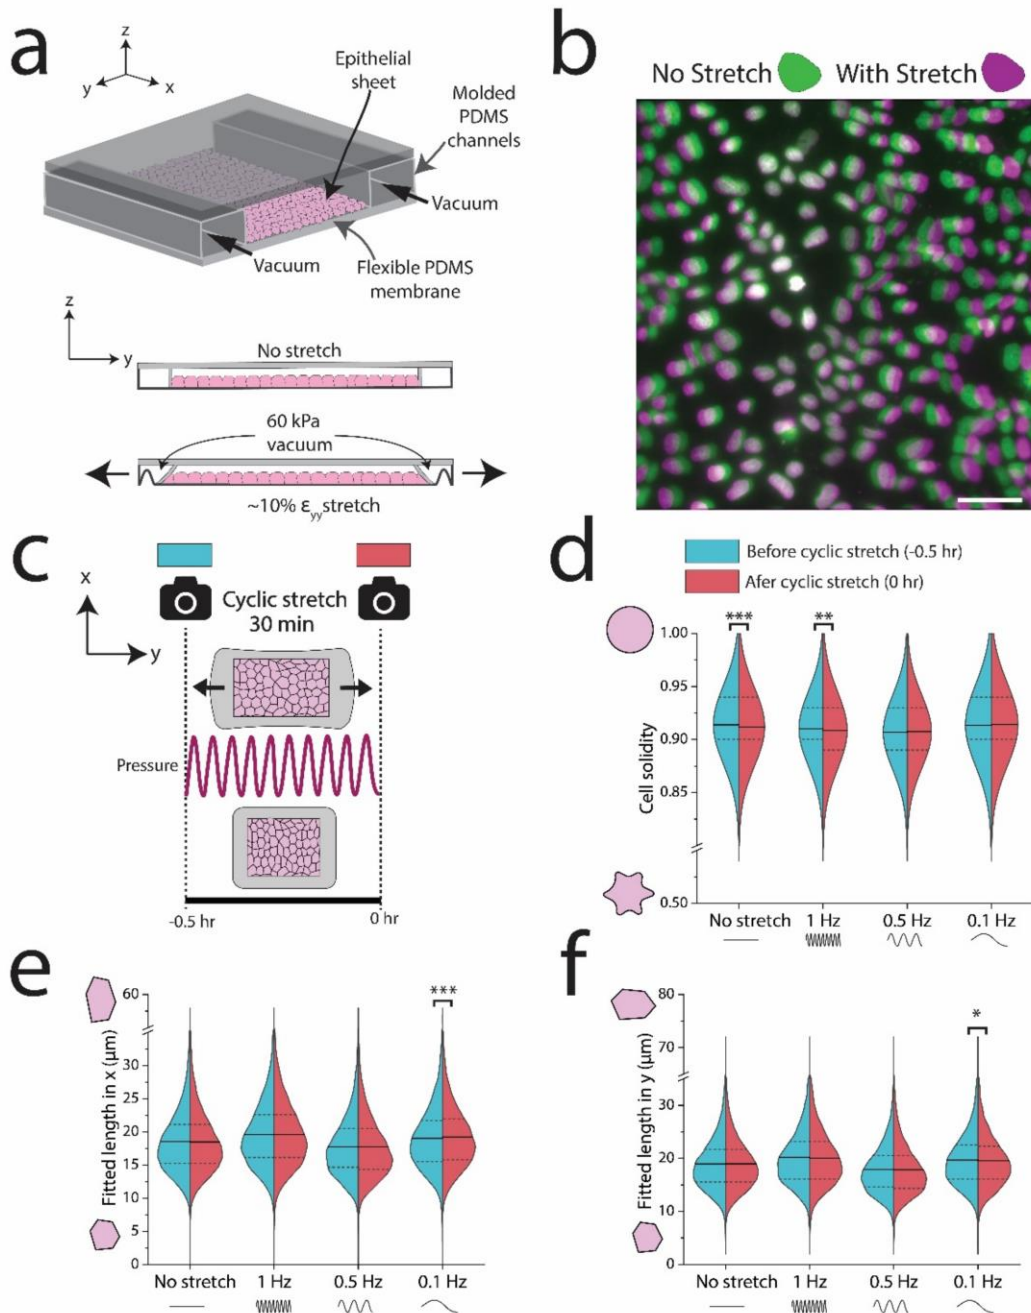

491

492 **Figure 1. Demonstration of uniaxial stretch device and segmentation of epithelial cells**  
493 **after cyclic stretch.** (a) Schematic of PDMS pneumatic cell stretching device. Vacuum in the  
494 outer chambers contracts the epithelium  $\sim 10\%$  uniaxially. (b) Nuclei were labeled with Hoechst  
495 and imaged before and after application of a 60 kPa vacuum to generate a 10% uniaxial stretch.  
496 Green nuclei indicate cells without stretch (0 kPa) and magenta denotes displaced nuclei in  
497 stretched cells (60 kPa). (c) Schematic of experiment for applying cyclic stretch to an epithelial  
498 sheet, where cells were imaged immediately before and after application of a sinusoidal 10%

499 stretch at different frequencies for 30 minutes. (d) At lower frequencies, cells retained their  
500 solidity. (e and f) At 0.1 Hz, cells elongated perpendicular to stretch and contracted in the  
501 direction of stretch.  $n > 10,000$  cells per half of each violin plot. Scale bar in (b) is 50  $\mu\text{m}$ .



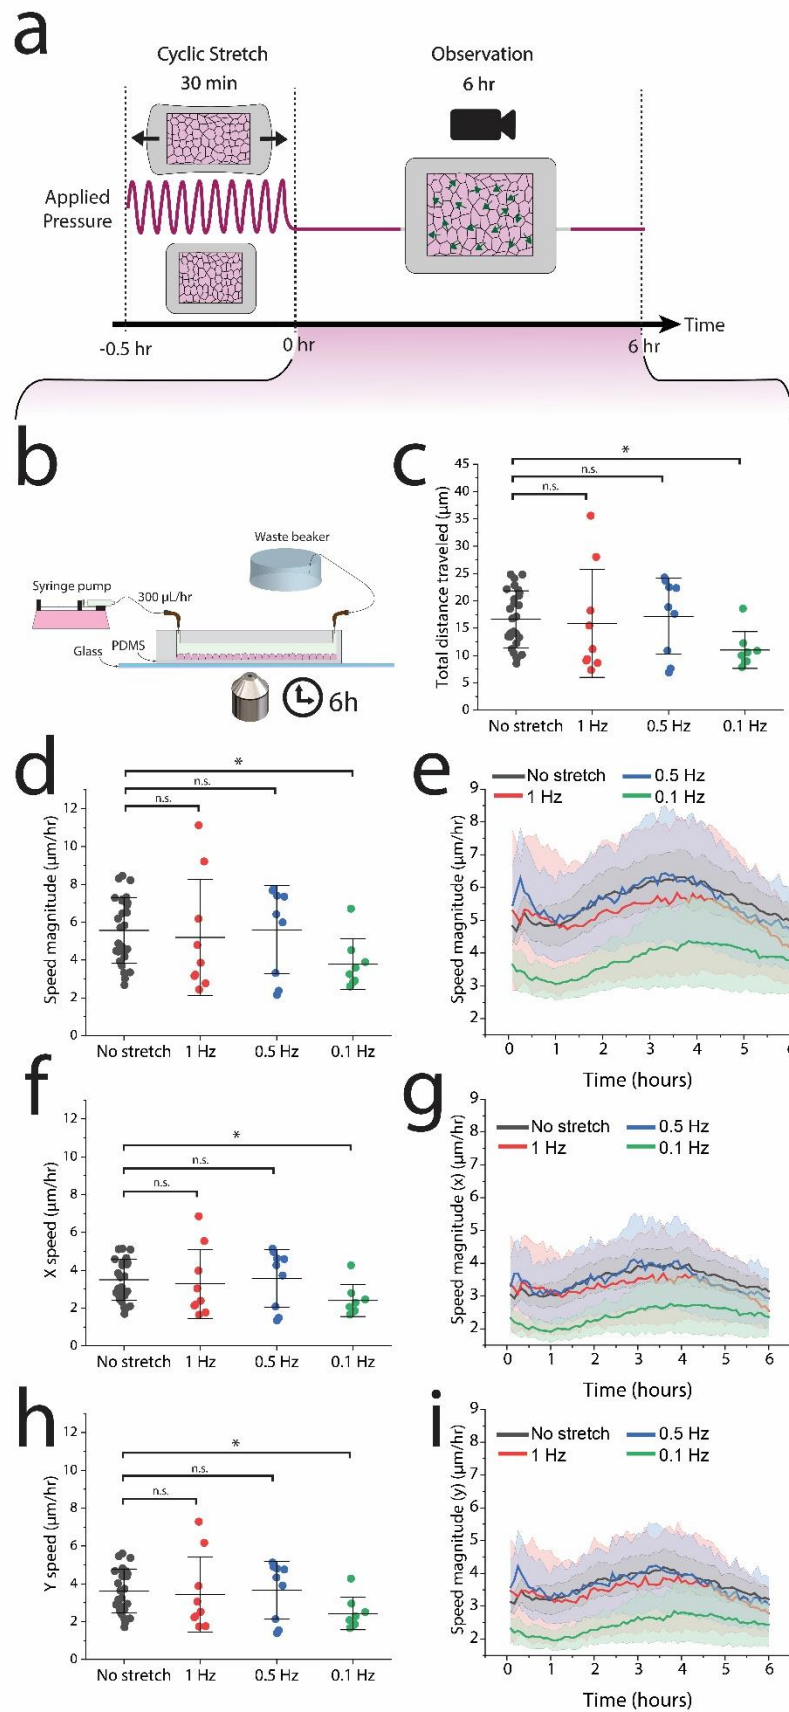

503 **Figure 2. Low frequency cyclic stretch reduces epithelial migration in a directionally**  
504 **independent manner.** (a) PIV analysis was conducted in the observation period, the 6 hours  
505 following 30 minutes of cyclic stretch. (b) After cyclic stretch, the device was integrated with a  
506 perfusion system and imaged on a glass slide to remove out-of-plane drift. (c) Cells traveled the  
507 shortest distance in response to 0.1 Hz, with no significant differences among the higher  
508 frequencies. (d) The average cell speed diminished significantly in response to a 0.1 Hz  
509 frequency. (e) The reduced migratory effect predominantly lasted ~2 hours. (f-i) Both the x and y  
510 speeds are reduced in response to 0.1 Hz uniaxial stretch. No-stretch control: n=27 across 9  
511 independent experiments, 1 Hz: n=9 across 3 independent experiments, 0.5 Hz n=9 across 3  
512 independent experiments, 0.1 Hz: n=8 across 3 independent experiments.

513

514

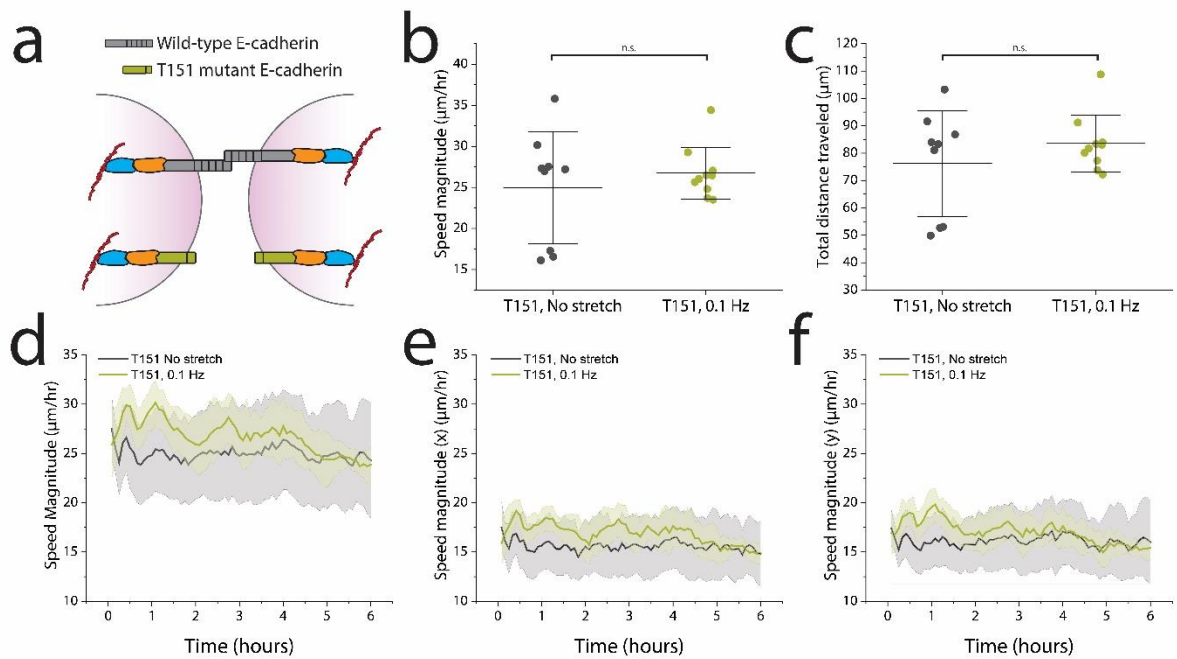

515

516 **Figure 3. The extracellular domain of E-cadherin is necessary for reducing migration after**  
517 **0.1 Hz stretching.** (a) The extracellular domains of E-cadherin are truncated on the T151 MDCK  
518 cells, preventing formation of the adherens junction while allowing formation of other cell-cell  
519 adhesions. (b,c) T151 MDCK cells showed no significant differences in collective average speed  
520 magnitude nor total distance traveled over the course of 6 hours following 0.1 Hz cyclic stretch  
521 (green). (d) Migration speed after cyclic stretch did not differ significantly from the no-stretch  
522 control. (e,f) The migratory response showed no directional dependence. No-stretch control: n=9  
523 across 9 independent experiments, 0.1 Hz: n=10 across 4 independent experiments.

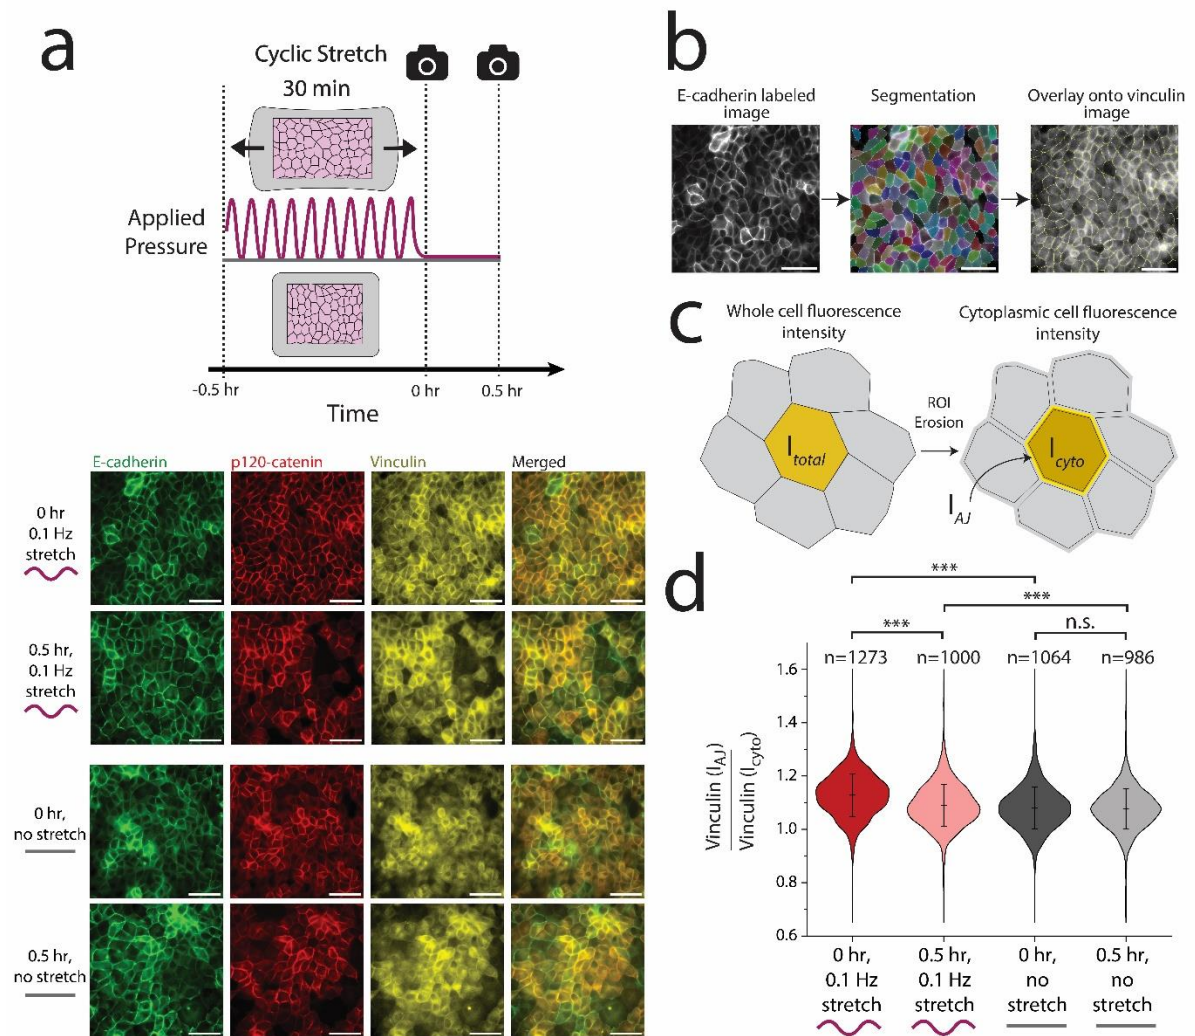

524

525 **Figure 4. 0.1 Hz cyclic stretch transiently regulates vinculin recruitment to cell-cell**  
 526 **contacts.** (a) Epithelial sheets were cyclically stretched for 30 minutes at ~10% stretch and either  
 527 fixed immediately or fixed after 30 minutes (i.e., 60 minutes after the onset of stretch). Staining for  
 528 E-cadherin (green) and p120 catenin (red) showed no observable differences in response to  
 529 cyclic stretch. However, staining for vinculin indicated increased localization to cell-cell contacts in  
 530 response to cyclic stretch. (b) Vinculin quantification: E-cadherin labeled images were segmented  
 531 and the resulting ROIs were overlaid onto the corresponding vinculin labeled images. (c) All ROIs  
 532 were then eroded 3 px to isolate the cytoplasmic region of the cell from the edges of the cell. By  
 533 obtaining the fluorescence intensity of vinculin in the total cell ( $I_{total}$ ) as well as the fluorescence  
 534 intensity of vinculin in the cytoplasm for the eroded cell ( $I_{cyto}$ ), we computed the fluorescence  
 535 intensity of vinculin at the cell-cell contact ( $I_{AJ}$ ) using the area fraction of the cytoplasm (see  
 536 **Supplementary Fig. S5**). The ratio of vinculin intensity at cell edges to vinculin intensity in the  
 537 cytoplasm showed a stark increase immediately after cyclic stretch, though diminished after 30  
 538 minutes. Scale bars are 50  $\mu$ m. IHC images shown here were contrast enhanced to help visualize  
 539 the proteins of interest, but not altered for segmentation analysis.

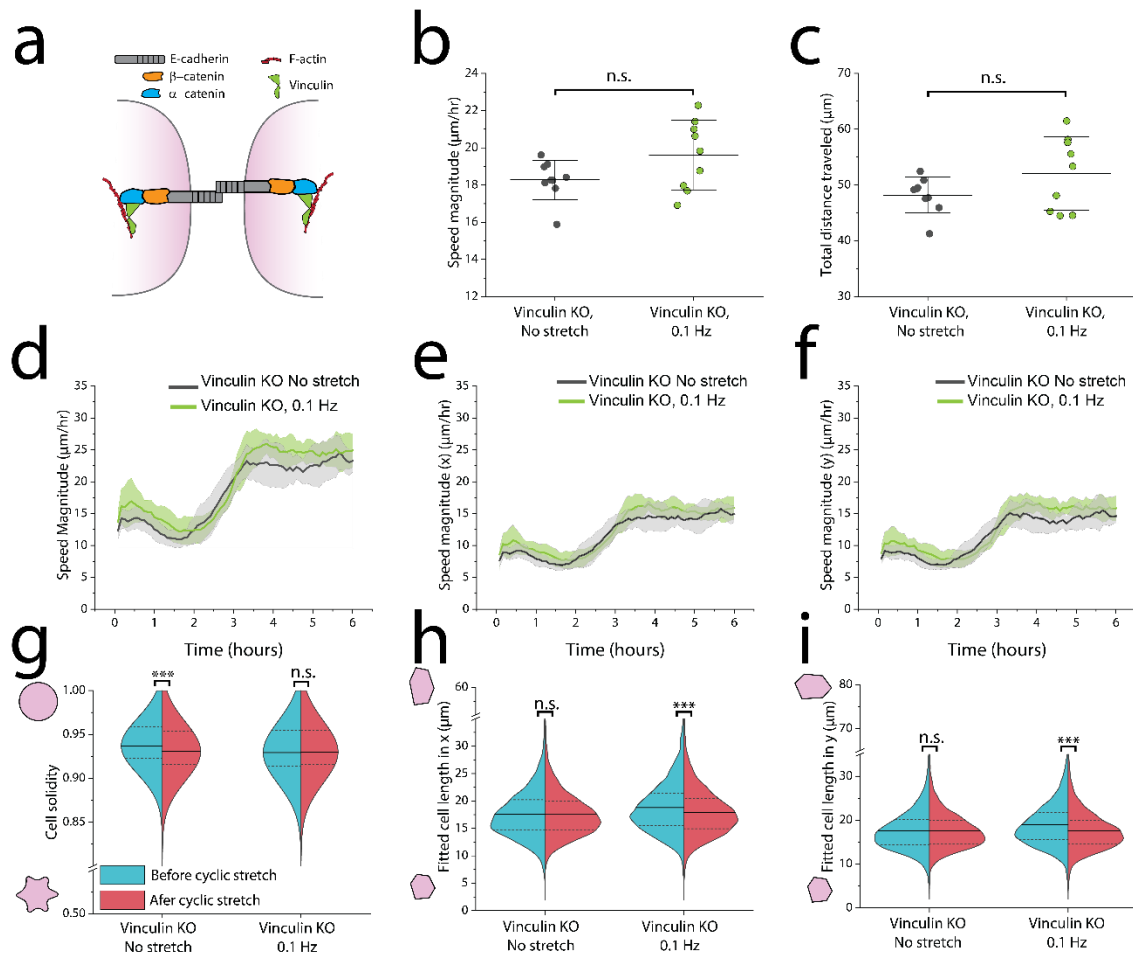

540

541

**Figure 5. Vinculin regulates migratory response of MDCK cells to cyclic stretch, but not cell morphology.**

542

(a) Vinculin reinforces the  $\alpha$ -catenin/F-actin complex during mechanical load.

543

(b, c) Migration speed averaged across 6 hours following 30 minutes of cyclic stretch indicates no significant differences.

544

(d-f) When plotted as a function of time, the Vinculin KO cells followed the same speed profile independently of cyclic stretch and direction.

545

(g-h) Across all experiments, 5,000-10,000 cells were segmented immediately before and after 30 minutes of 0.1 Hz cyclic stretch.

546

(g) Immediately after cyclic stretch, Vinculin KO cells retain their solidity while the solidity significantly decreases in the no-stretch control.

547

(h, i) Vinculin KO cells also shorten their length in both x and y directions. No-stretch control: n=9 across 3 independent experiments, 0.1 Hz: n=9

548

across 3 independent experiments. n>5,000 cells per half of each violin plot.

549

550
